# Supplementary material for: Association between Variants in the OCA2-HERC2 Region and Blue Eye Colour in HERC2 rs12913832 AA and AG Individuals
Source: MDPI journal article supplement (doi:10.3390/genes14030698), 2023-03-11
Supplement: s1 [file s1]

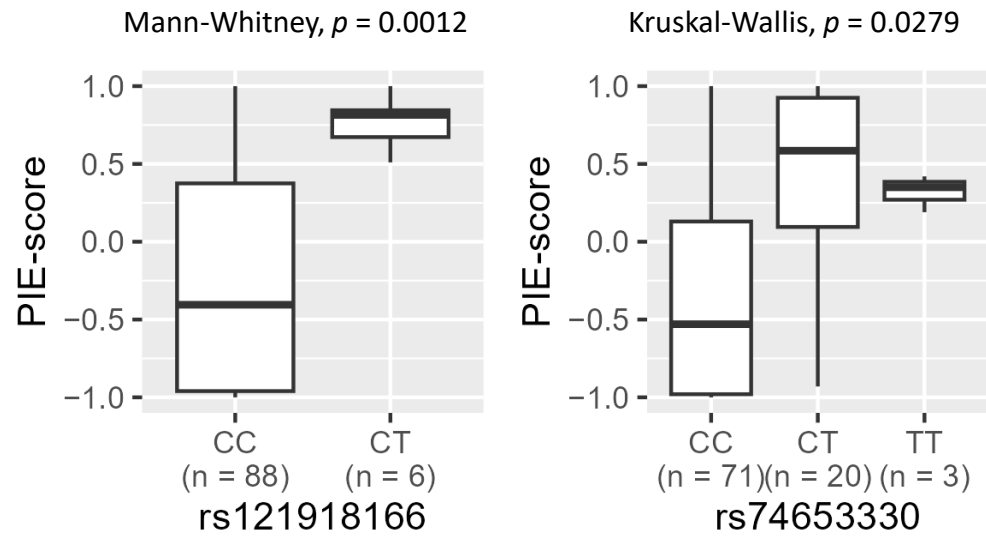

Figure S1: PIE scores and genotypes of rs121918166 and rs74653330 in the study cohort ( $n = 94$ ).

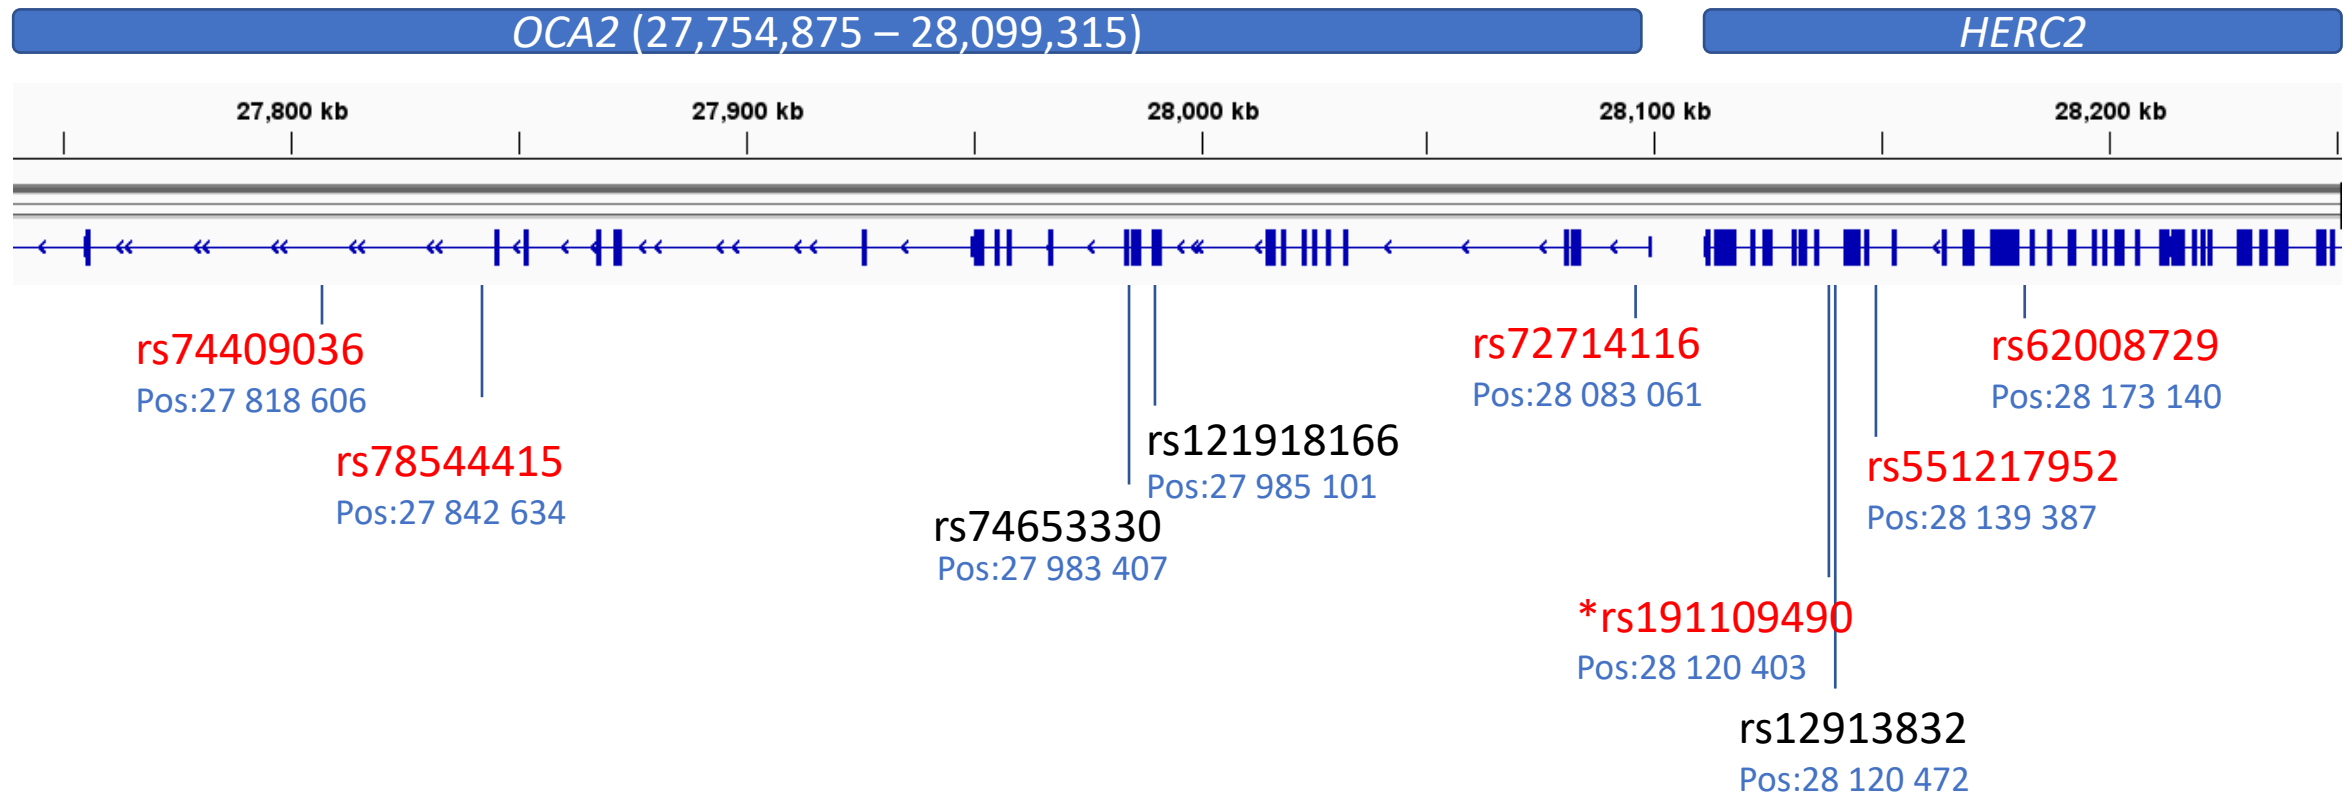

Figure S2: Chromosomal position of the six blue eye colour candidate variants (red), the two missense variants rs74653330 and rs121918166, and the main eye colour predictor SNP rs12913832. Pos = chromosomal position (GRCh38).

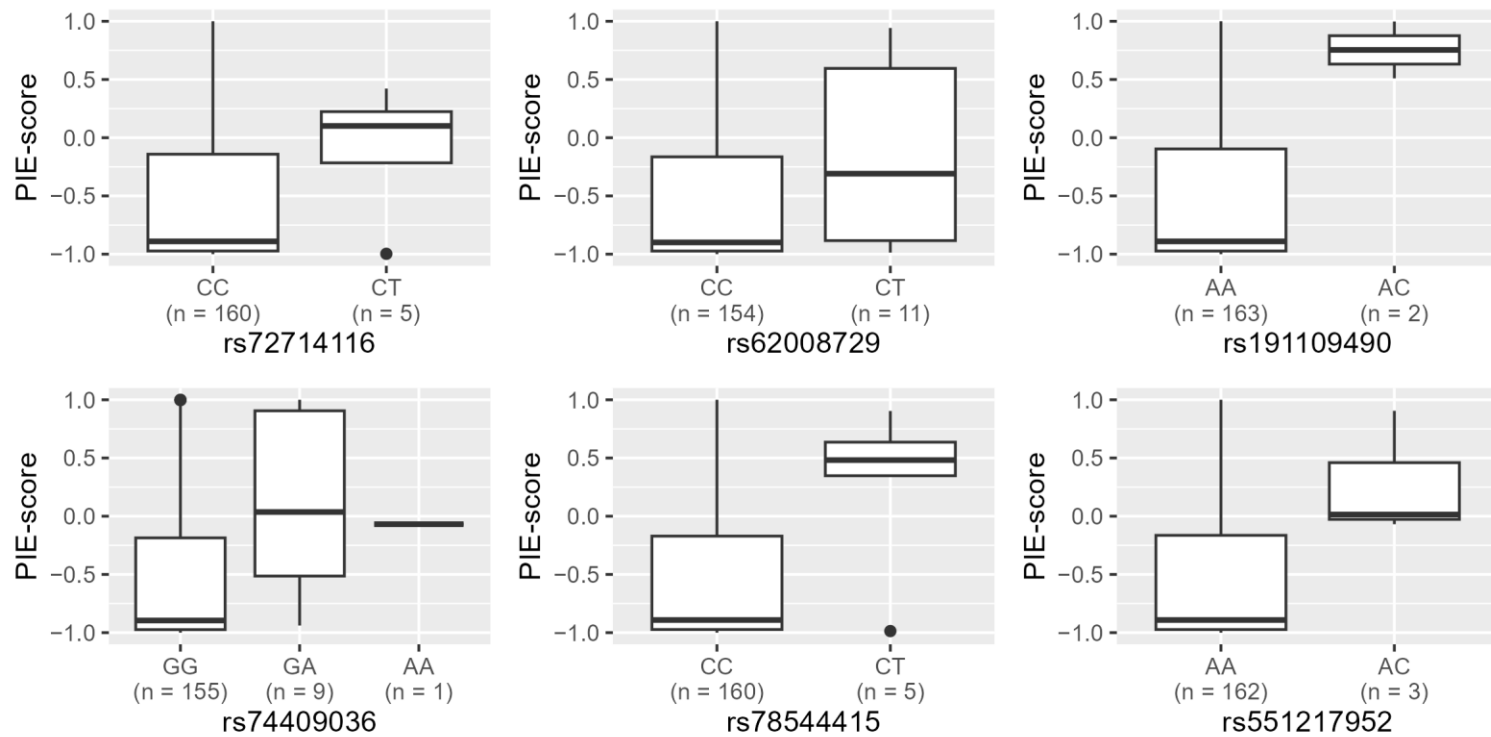

Figure S3: Genotypes and PIE-scores for the candidate blue eye colour variants typed in rs12913832 AA and AG individuals ( $n = 165$ ) from the Norwegian biobank population.
